# Supplementary material for: Intrinsic ferromagnetism and the quantum anomalous Hall effect in two-dimensional MnOCl2 monolayers
Source: Royal Society of Chemistry journal article supplement (doi:10.1039/d2cp02384a), 2022-01-01
Supplement: d2cp02384a1.pdf [file d2cp02384a1.pdf]

## **Supplementary information “Intrinsic ferromagnetism and quantum anomalous Hall effect in two-dimensional MnOCl<sub>2</sub> monolayers”**

Guang Song,<sup>a,\*</sup> Chengfeng Zhang,<sup>a</sup> Tengfei Xie,<sup>a</sup> Qingkang Wu,<sup>a</sup> Bingwen Zhang,<sup>b</sup>  
Xiaokun Huang,<sup>c</sup> Zhongwen Li,<sup>a</sup> Guannan Li,<sup>a</sup> and Benling Gao<sup>a</sup>

<sup>a</sup>*Department of Physics, Huaiyin Institute of Technology, Huaian 223003, China*

<sup>b</sup>*Fujian Key Laboratory of Functional Marine Sensing Materials, Minjiang University, Fuzhou 350108, China*

<sup>c</sup>*School of Materials Science and Engineering, Jingdezhen Ceramic Institute, Jingdezhen 333001, China*

\* Corresponding author: Guang Song, [gsong@hyit.edu.cn](mailto:gsong@hyit.edu.cn);

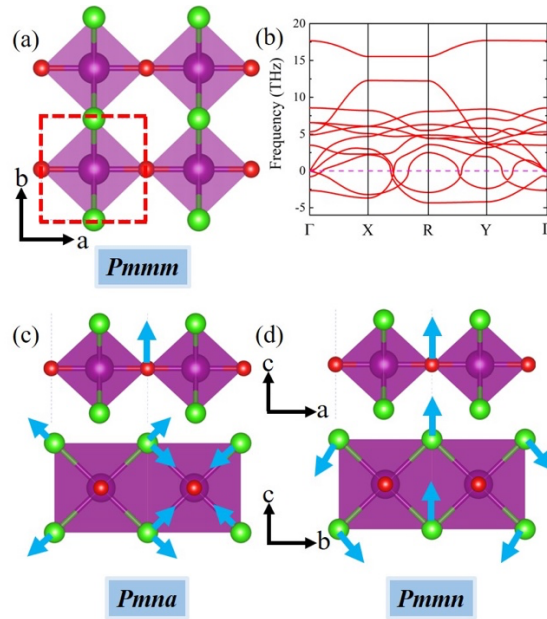

Fig. S1. (a) The schematic of *Pmmm*-MnOCl<sub>2</sub> monolayer. (b) The phonon dispersion of *Pmmm*-MnOCl<sub>2</sub> monolayer. (c) and (d) Two different lattice distortions modes according to the soft mode in (b). The blue arrows represent the moving directions for different atoms.

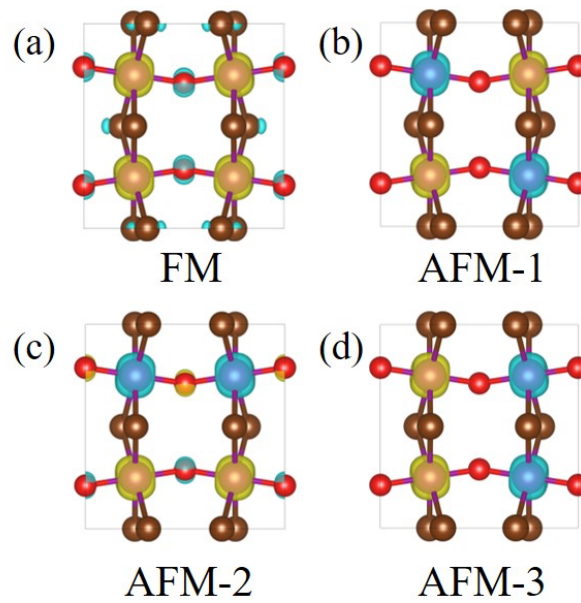

Fig. S2. Spin density isosurfaces of *Pmnn*-MnOCl<sub>2</sub> monolayer at the absolute value of  $|\Delta\rho| = 0.2$  electrons per  $\text{\AA}^3$  for the four magnetic orders. Yellow and green isosurfaces correspond to positive and negative spin density, respectively.

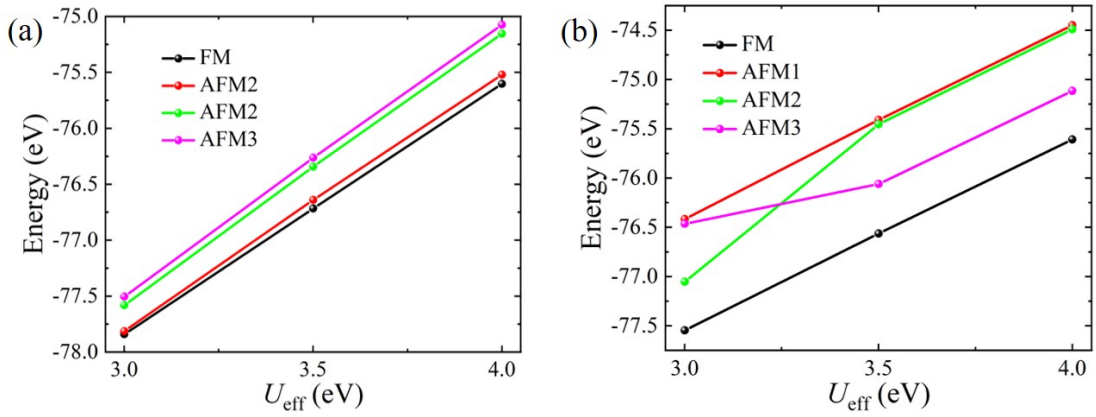

Fig. S3. The calculated total energy of different magnetic ordering as a function of  $U_{\text{eff}}$ . (a)  $Pmna$ - $MnOCl_2$ . (b)  $Pmmn$ - $MnOCl_2$ .

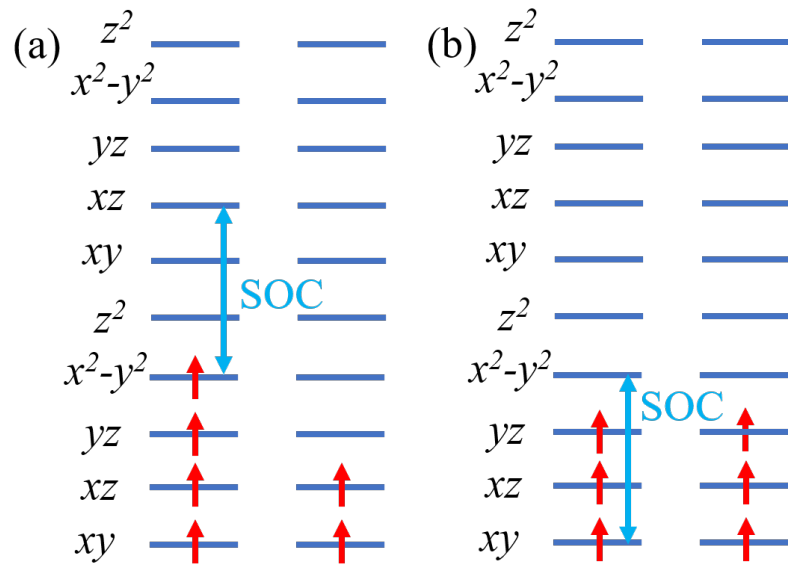

Fig. S4. The orbital structure for  $MnOCl_2$  monolayers. (a)  $Pmna$ - $MnOCl_2$  monolayer. (b)  $Pmmn$ - $MnOCl_2$  monolayer.

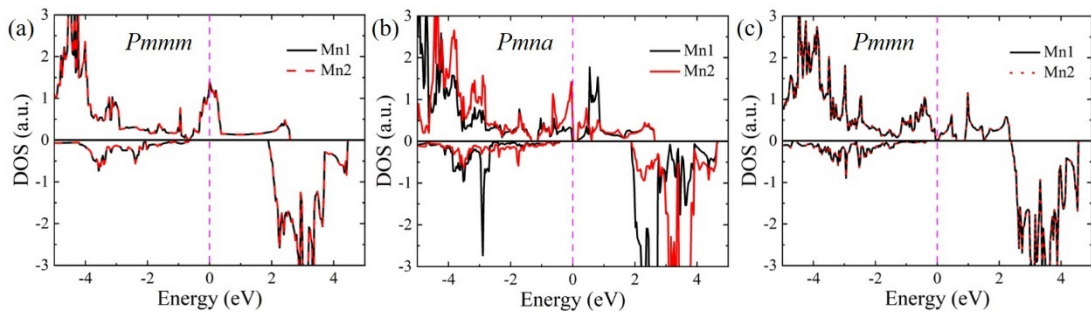

Fig. S5. The calculated density of states for nearest neighbor Mn ions. (a)  $Pmmm$ - $MnOCl_2$  monolayer. (b)  $Pmna$ - $MnOCl_2$  monolayer. (c)  $Pmmn$ - $MnOCl_2$  monolayer.

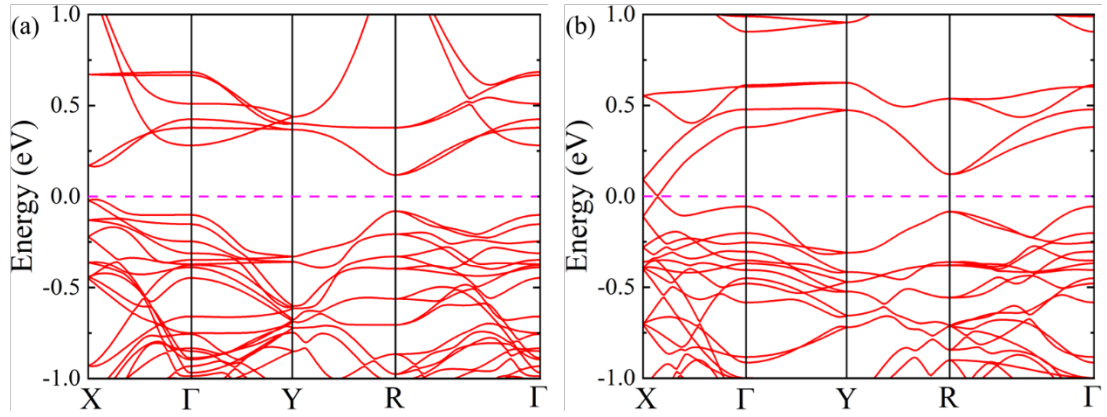

Fig. S6. The calculated bands-structure for  $Pmna$ - $MnOCl_2$  and  $Pmmn$   $MnOCl_2$  monolayers. (a)  $Pmna$ - $MnOCl_2$  monolayer. (b)  $Pmmn$   $MnOCl_2$  monolayer.

Table S1. The calculated lattice parameter for  $MnOCl_2$  monolayers with GGA +  $U$  method.

|        | a (Å) | b (Å) | Mn-O (Å)    | Mn-Cl (Å)   | Mn-O-Mn (°) | Mn-Cl-Mn (°) |
|--------|-------|-------|-------------|-------------|-------------|--------------|
| $Pmmm$ | 3.616 | 3.499 | 1.808       | 2.430       | 180.00      | 92.12        |
| $Pmna$ | 7.229 | 7.115 | 1.795/1.863 | 2.530/2.324 | 162.28      | 94.16        |
| $Pmmn$ | 7.067 | 7.250 | 1.828       | 3.645/2.408 | 150.73      | 86.50/97.64  |

Table S2. The calculated total energies of different magnetic ordering and magnetic interactions in  $MnOCl_2$  monolayers with GGA +  $U$  method. The total energy of FM ordering is taken as reference. The unit are in the unit of eV for the total energy and meV for magnetic interaction.

|        | FM    | AFM1  | AFM2  | AFM3  | $J_x$  | $J_y$  | $J_{xy}$ |
|--------|-------|-------|-------|-------|--------|--------|----------|
| $Pmmm$ | 0.000 | 0.214 | 0.058 | 0.188 | -2.326 | -0.010 | -0.004   |
| $Pmna$ | 0.000 | 0.336 | 0.028 | 0.259 | -15.76 | -2.90  | 0.67     |
| $Pmmn$ | 0.000 | 1.131 | 0.495 | 1.084 | -47.77 | -15.05 | -6.22    |

Table S3. The calculated energy difference and magnetic interactions for  $Pmna$ - $MnOCl_2$  monolayer with HSE06 and PBEsol method. The total energy of FM ordering is taken as reference. The unit are in the unit of eV for the total energy and meV for magnetic interaction.

|        | FM    | AFM1  | AFM2  | AFM3  | $J_x$  | $J_y$ | $J_{xy}$ |
|--------|-------|-------|-------|-------|--------|-------|----------|
| HSE06  | 0.000 | 0.328 | 0.055 | 0.256 | -14.69 | -9.23 | 0.60     |
| PBEsol | 0.000 | 0.314 | 0.070 | 0.253 | -13.81 | -3.63 | -0.13    |

Table S4. The calculated energy difference and magnetic interactions for  $Pmmn$ - $MnOCl_2$  monolayer with HSE06 and PBEsol method. The total energy of FM ordering is taken as reference. The unit are in the unit of eV for the total energy and meV for magnetic interaction.

|        | FM    | AFM1  | AFM2  | AFM3  | $J_x$  | $J_y$  | $J_{xy}$ |
|--------|-------|-------|-------|-------|--------|--------|----------|
| HSE06  | 0.000 | 1.997 | 1.211 | 1.557 | -65.09 | -48.86 | -10.69   |
| PBEsol | 0.000 | 1.034 | 0.495 | 0.990 | -44.28 | -13.15 | -5.37    |

Table S5. Matrix elements  $|\langle o|\mathbf{S} \cdot \mathbf{L}|u \rangle|^2$  of the spin-orbit coupling operator for  $d$ -orbitals, in units of  $\hbar^2$ . Spin up and spin down orbits are represented by up and down arrows, respectively.

|                      | $d_{xy} \uparrow$ | $d_{yz} \uparrow$ | $d_{z^2} \uparrow$ | $d_{xz} \uparrow$ | $d_{x^2} \uparrow$ | $d_{xy} \downarrow$ | $d_{yz} \downarrow$ | $d_{z^2} \downarrow$ | $d_{xz} \downarrow$ | $d_{x^2} \downarrow$ |
|----------------------|-------------------|-------------------|--------------------|-------------------|--------------------|---------------------|---------------------|----------------------|---------------------|----------------------|
| $d_{xy} \uparrow$    | 0                 | 0                 | 0                  | 0                 | 4                  | 0                   | 1                   | 0                    | 1                   | 0                    |
| $d_{yz} \uparrow$    | 0                 | 0                 | 0                  | 1                 | 0                  | 1                   | 0                   | 3                    | 0                   | 1                    |
| $d_{z^2} \uparrow$   | 0                 | 0                 | 0                  | 0                 | 0                  | 0                   | 3                   | 0                    | 3                   | 0                    |
| $d_{xz} \uparrow$    | 0                 | 1                 | 0                  | 0                 | 0                  | 1                   | 0                   | 3                    | 0                   | 1                    |
| $d_{x^2} \uparrow$   | 4                 | 0                 | 0                  | 0                 | 0                  | 0                   | 1                   | 0                    | 1                   | 0                    |
| $d_{xy} \downarrow$  | 0                 | 1                 | 0                  | 1                 | 0                  | 0                   | 0                   | 0                    | 0                   | 4                    |
| $d_{yz} \downarrow$  | 1                 | 0                 | 3                  | 0                 | 1                  | 0                   | 0                   | 0                    | 1                   | 0                    |
| $d_{z^2} \downarrow$ | 0                 | 3                 | 0                  | 3                 | 0                  | 0                   | 0                   | 0                    | 0                   | 0                    |
| $d_{xz} \downarrow$  | 1                 | 0                 | 3                  | 0                 | 1                  | 0                   | 1                   | 0                    | 0                   | 0                    |
| $d_{x^2} \downarrow$ | 0                 | 1                 | 0                  | 1                 | 0                  | 4                   | 0                   | 0                    | 0                   | 0                    |

Table S6. The calculated energy when the spin along different direction and magnetic anisotropy coefficient in  $\text{MnOCl}_2$  monolayers with GGA +  $U$  method. The energy of [100] directions is taken as reference. The unit are all in the unit of  $\mu\text{eV}$ .

|        | 001     | 100  | 010     | 110     | $K_y$  | $K_z$  |
|--------|---------|------|---------|---------|--------|--------|
| $Pmna$ | -9.25   | 0.00 | -95.25  | -48.25  | 42.33  | 4.11   |
| $Pmmn$ | -275.00 | 0.00 | -228.50 | -113.50 | 101.56 | 122.22 |

Table S7. The calculated magnetic moment for different atoms in  $\text{MnOCl}_2$  monolayers with GGA +  $U$  method. The unit are all in the unit of  $\mu_B$ .

|        | Mn1   | Mn2   | O      | Cl1    | Cl2    |
|--------|-------|-------|--------|--------|--------|
| $Pmmm$ | 3.435 | -     | -0.305 | -0.080 | -0.080 |
| $Pmna$ | 3.600 | 3.179 | -0.287 | -0.067 | -0.066 |
| $Pmmn$ | 3.732 | 3.727 | -0.335 | -0.061 | -0.317 |
